# Supplementary material
Source: publisher site journal article supplement (https://www.dovepress.com/article/379526)
Supplement: Supplementary file 1 [file get_supplementary_file.php]

**Supporting Information**

**Multifunctional nanosnowflakes for T1-T2 double-contrast enhanced MRI and PAI guided Oxygen self-supplementing effective anti-tumor therapy**

Yijie Lv1, Junnan Kan1, Mingfang Luo2, Changfeng Yang1, Xunrong Luo2, Xiaoqian Lin1, Hao Li1, Xueming Li1, Yuping Li1, Caixia Yang1, Yan Liu1*, Xianglin Li1*

1Author affiliations

School of Medical Imaging, Binzhou Medical University, Yantai, Shandong, 264003, P. R. China.

2Author affiliations

Department of Radiology, Sichuan Provincial People's Hospital, Chengdu, Sichuan, 610072, P. R. China.

Email: xlli@bzmc.edu.cn


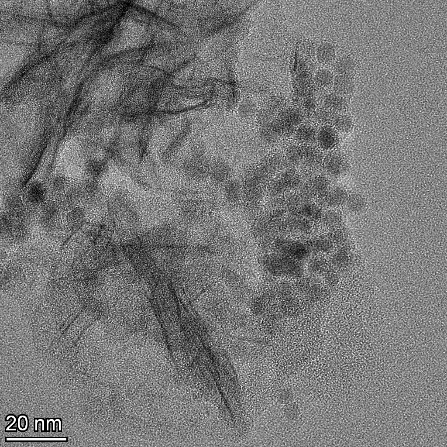




**Figure S1.** The HRTEM image of UMC.


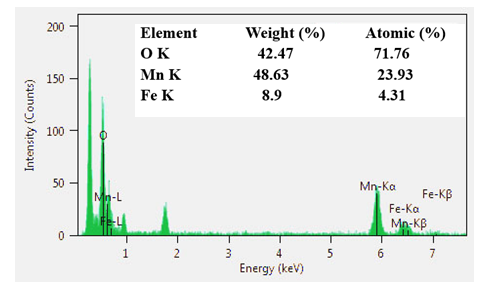


**Figure S2.** The EDS analysis of UMC.


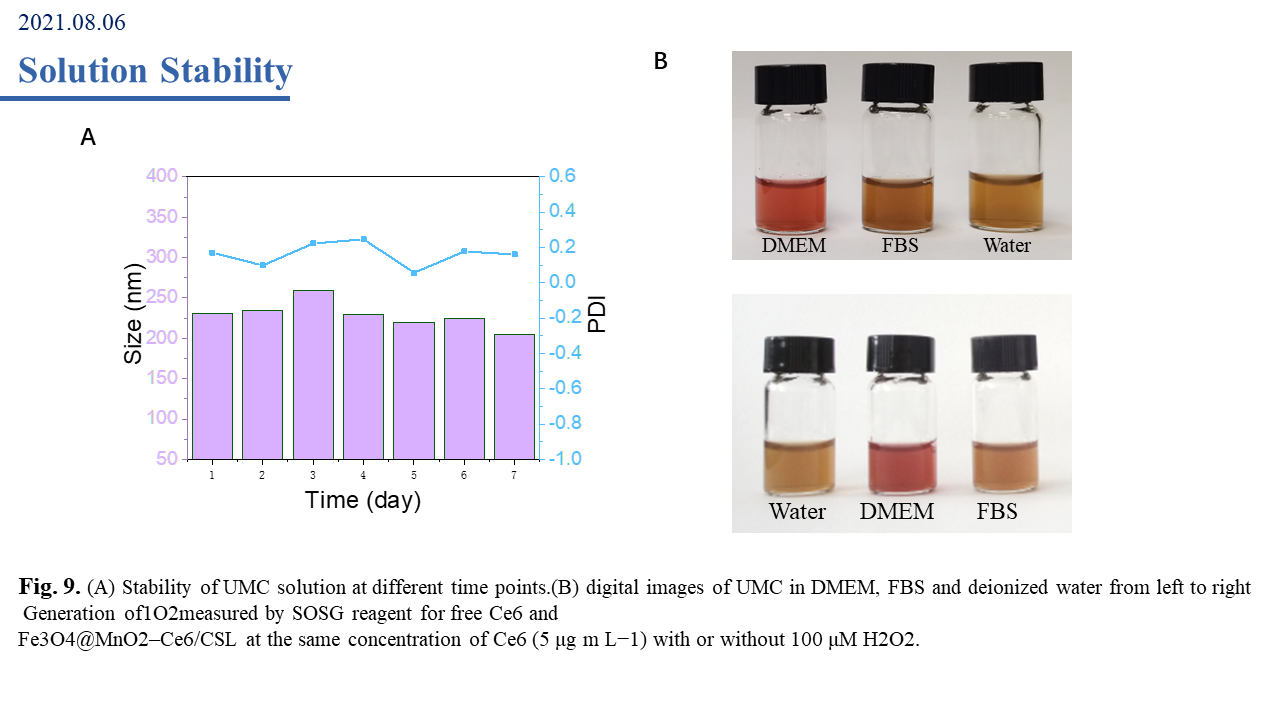


**Figure S3.** Digital image of UMC in different solutions.





**Figure S4.** The size of UMC dispersed in water, DMEM and FBS.

**
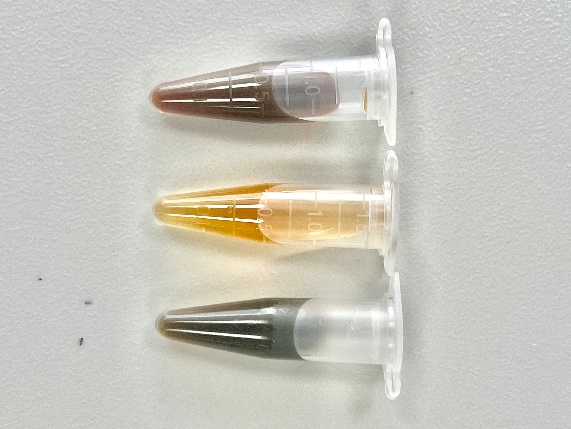
**

**Figure S5.** Digital image changes of (a) MnO2, (b) USPIO, and (c) UMC after reaction with H2O2 solution (0 μM), respectively.





**Figure S6.** Measurement of particle size and PDI changes for UMC within seven days by DLS.


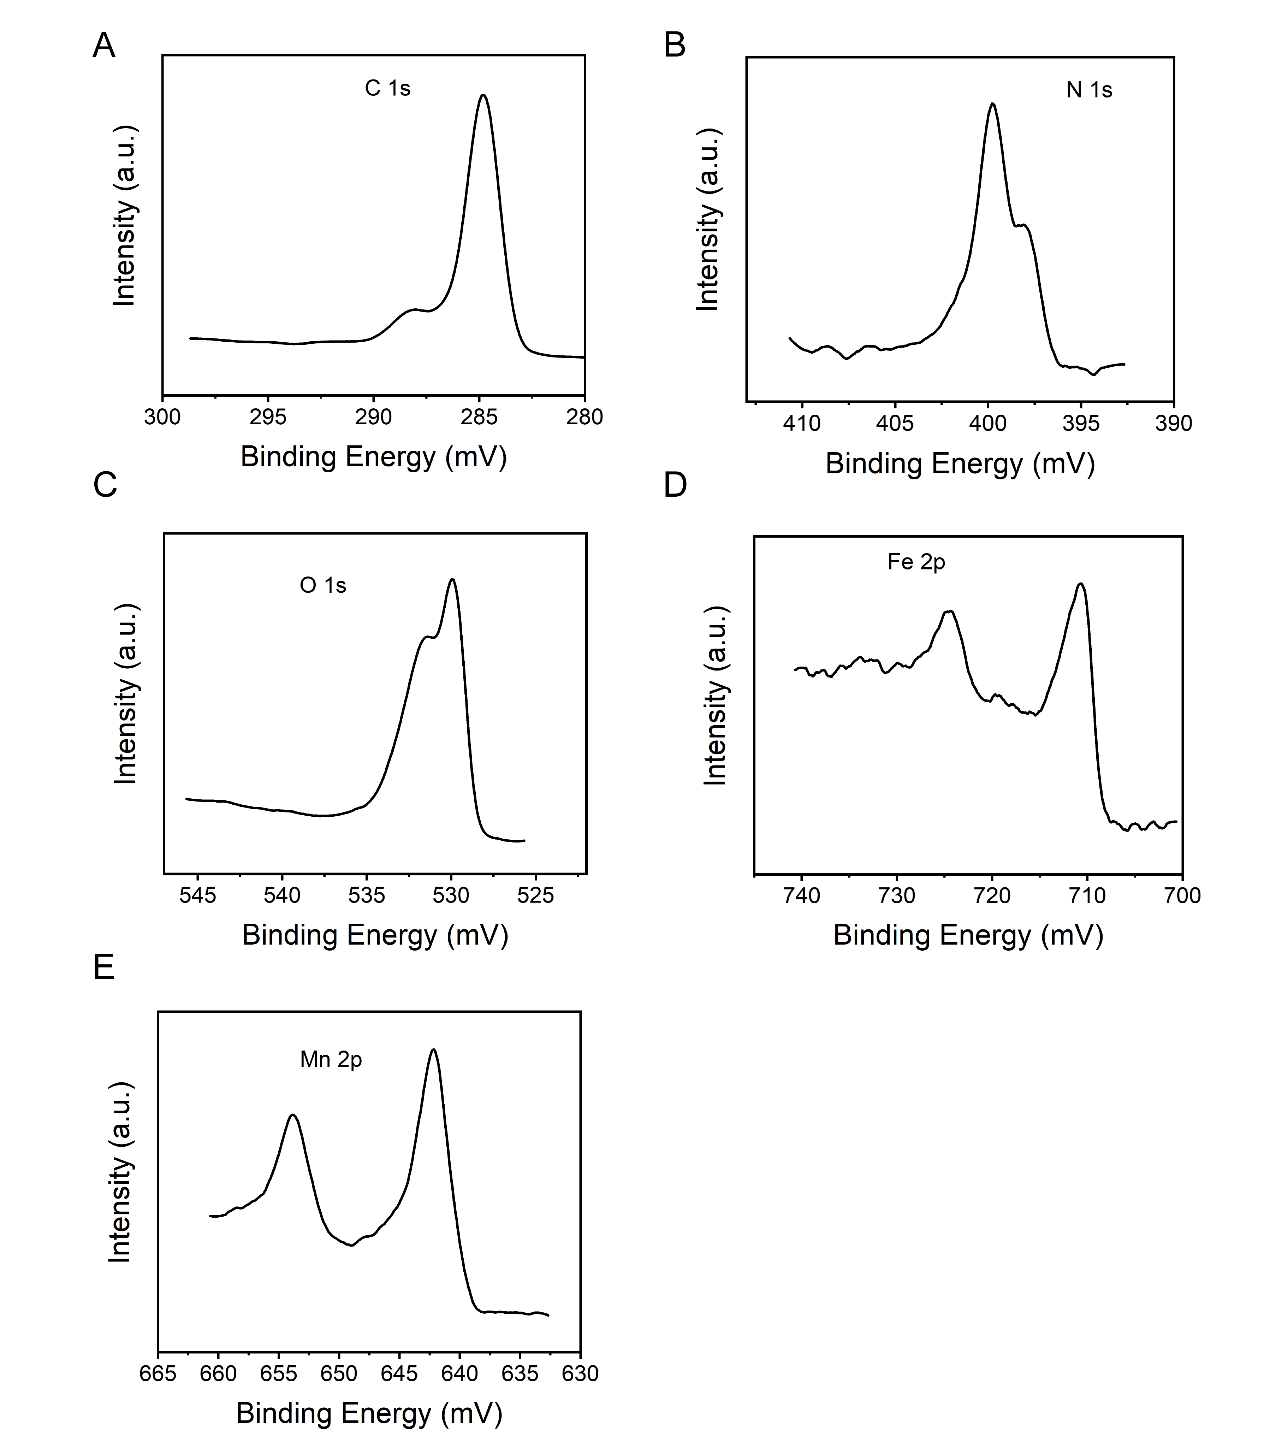


**Figure S7.** XPS spectrum of UMC: (A) C, (B) N, (C) O, (D) Fe, and (E) Mn.







**Figure S8.** UV-vis absorption of Ce6 at different concentrations and the standard curve equation of Ce6.





**Figure S9.** Cell viability inﬂuenced by free Ce6 with laser (20 mW/cm2, 3 min) in normal and hypoxic conditions.


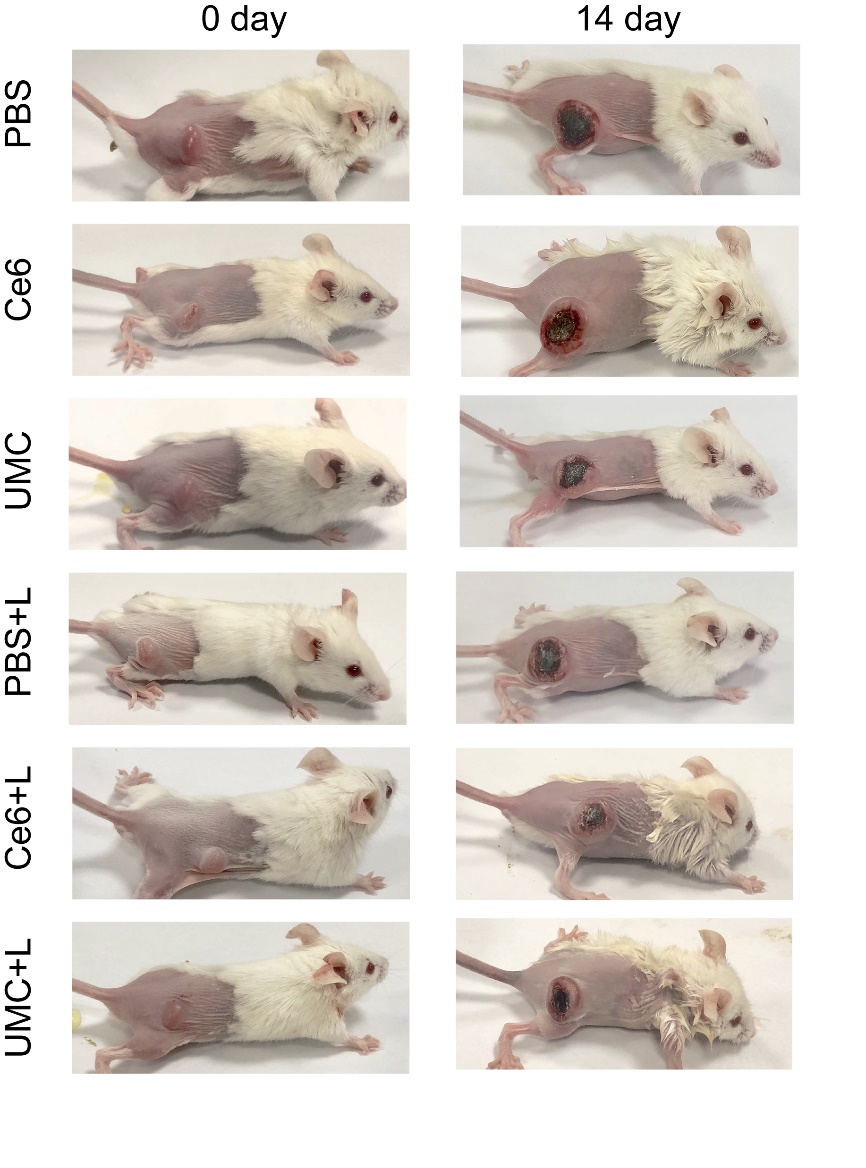


**Figure S10.** Photographs of mice in different treatment groups before and after treatment.
